# Supplementary material for: Phase synchrony between prefrontal noradrenergic and cholinergic signals indexes inhibitory control
Source: PubMed Central journal article supplement — bioRxiv. 2025 Jan 27:2024.05.17.594562. Originally published 2024 May 17. Preprint. [Version 2] doi: 10.1101/2024.05.17.594562 (PMC11118516; doi:10.1101/2024.05.17.594562), 2025-01-27
Supplement: NIHPP2024.05.17.594562V1-supplement-1.pdf [file NIHPP2024.05.17.594562V1-supplement-1.pdf]

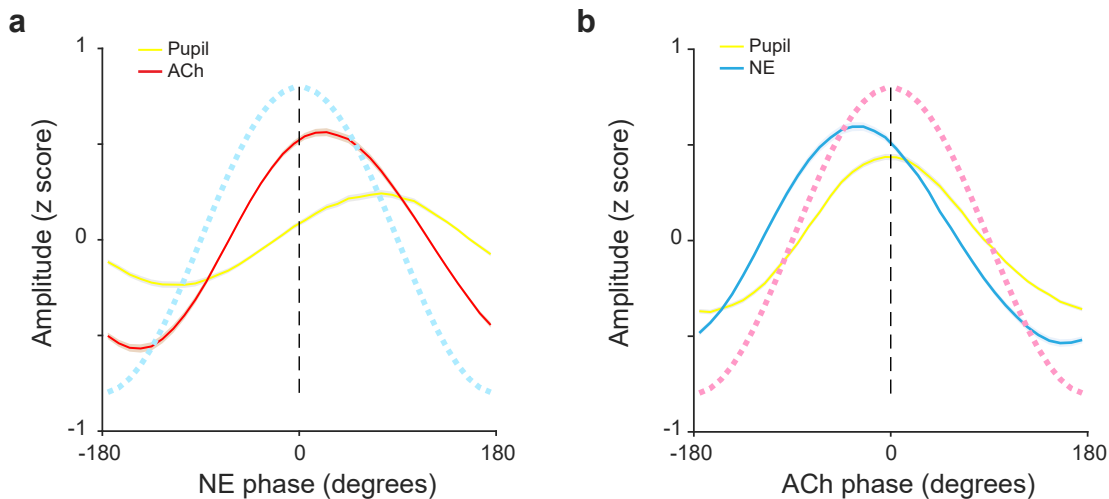

**Supplemental figure 1. The phase relationship among prefrontal NE, ACh and pupil fluctuations. a) ACh and pupil phase referenced to NE phase. b) NE and pupil phase referenced to ACh phase.**

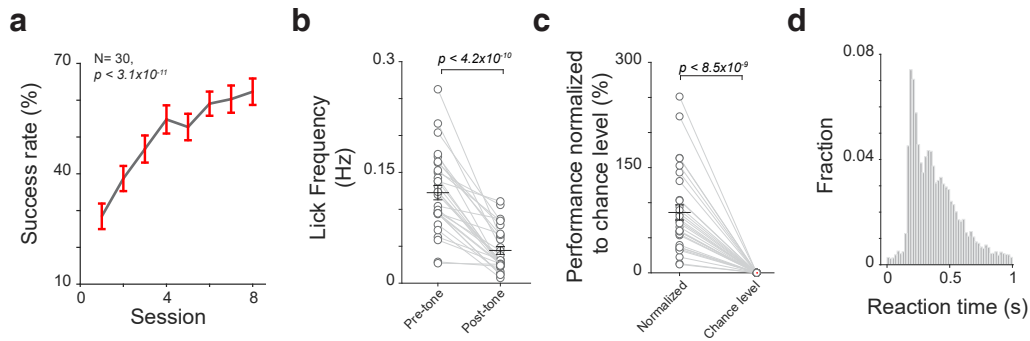

**Supplemental figure 2. The inhibitory control task performance. a)** The increase in success rate during the initial training sessions indicated that the suppression of impulsive licking was a learned behavior. **b)** Mean licking frequency within a 2-second window prior to vs. after the onset of inhibition tone. **c)** Inhibitory control task performance normalized to the chance level performance. **d)** Histogram of reaction time in successful trials.

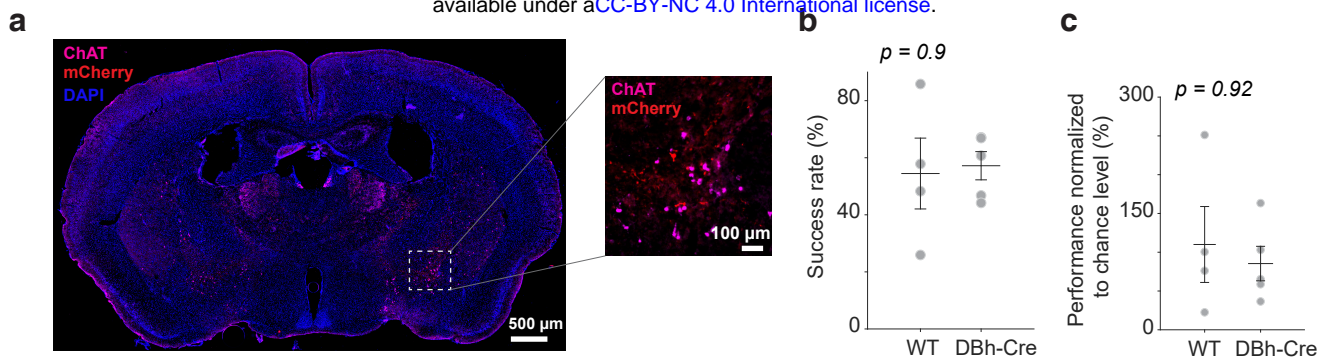

**Supplemental figure 3. a)** mCherry expression in putative LC axons in the basal forebrain region in DBh-Cre mice. **b)** Raw success rate of WT and DBh-Cre mice in the saline control sessions. **c)** Normalized behavioral performance of WT and DBh-Cre mice in saline control sessions.

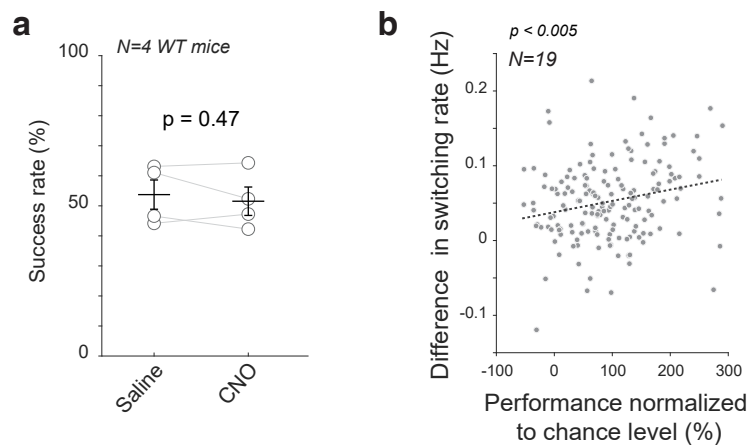

**Supplemental figure 4. a)** CNO alone did not affect animals' inhibitory control. **b)** Difference in switching rate between the successful and failed trials was positively correlated with inhibitory control performance.

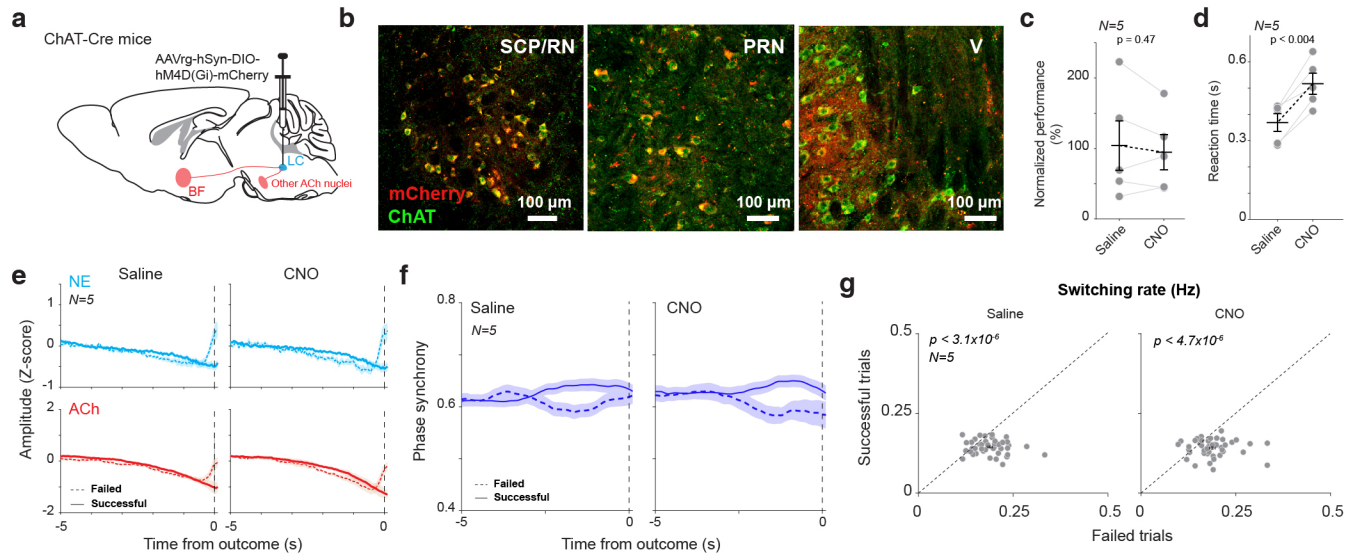

**Supplemental figure 5. Chemogenetically silencing cholinergic neurons that project to the LC area did not impair inhibitory control, nor did it change prefrontal NE-ACh phase synchrony.** **a)** Diagram of retrograde expression of DREADD receptors in cholinergic neurons that project to the LC area. **b)** Histological confirmation of mCherry expression in the superior cerebellar peduncle (SCP)/Red nucleus (RN), pontine reticular nucleus (PRN), and trigeminal motor nucleus (V). **c)** Chemogenetic inhibition of cholinergic neurons that project to the LC region had no effect on inhibitory control. **d)** Chemogenetic inhibition of cholinergic neurons that project to the LC region slowed down the reaction time. **e)** Prefrontal NE/ACh signals prior to behavioral outcomes in the successful and failed trials under saline or CNO treatment. **f)** Prefrontal NE-ACh phase synchrony prior to behavioral outcomes in the successful and failed trials under saline and CNO treatment. **g)** Mean switching rate prior to behavioral outcomes in the successful vs. failed trials under saline or CNO treatment. All data are from 43 saline sessions and 43 CNO sessions from 5 animals.

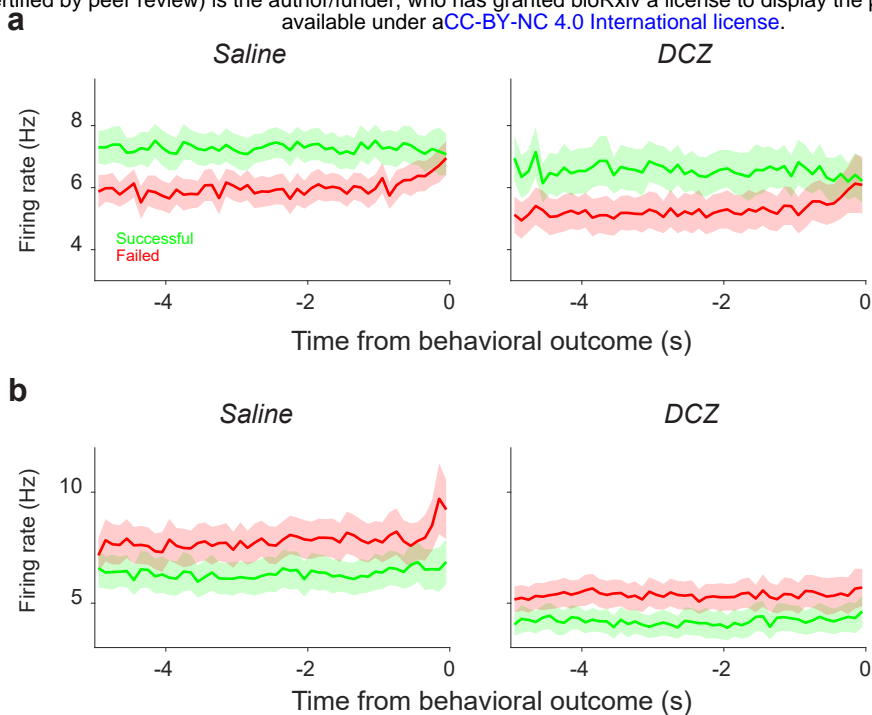

**Supplemental figure 6. Firing rate of prefrontal encoding neurons during inhibitory control.** **a)** Population firing rate prior to behavioral outcomes in the successful and failed trials under saline and DCZ treatment for encoding neurons with a higher firing rate in successful trials. **b)** Population firing rate prior to behavioral outcomes in the successful and failed trials under saline and DCZ treatment for encoding neurons with a lower firing rate in successful trials. All data are from 15 saline sessions and 15 DCZ sessions from 3 animals.

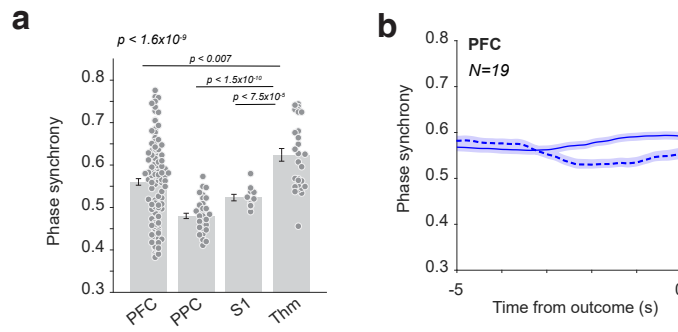

**Supplemental figure 7. NE-ACh phase synchrony in different brain structures during inhibitory control. a)** NE-ACh phase synchrony is higher in the thalamus than in the cortex. PFC: 165 sessions from 19 animals; PPC: 38 sessions from 4 animals; S1: 11 sessions from 1 animal; Thm: 31 sessions from 3 animals. **b)** NE-ACh phase synchrony in the prefrontal cortex prior to behavioral outcomes in the successful and failed trials. 165 sessions from 19 animals.

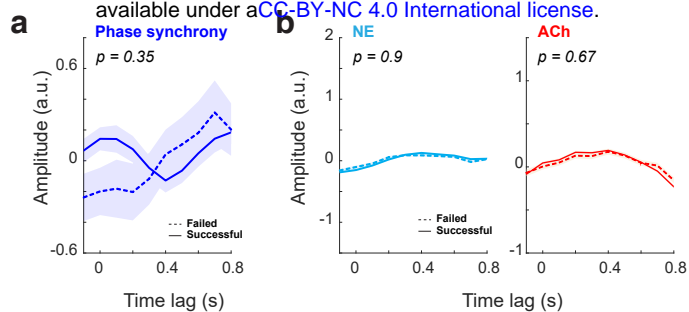

**Supplemental figure 8. Temporal response functions (TRFs) during the free period. a)** TRF mapping prefrontal NE-ACh phase synchrony to pupil size in the successful and failed trials during the free period. **b)** TRF mapping NE (left) and ACh (right) signals to pupil size in the successful and failed trials during the free period.
